# Supplementary material for: Quality of intrapartum and newborn care in Tigray, Northern Ethiopia
Source: PubMed Central journal article supplement (PMC6339373; doi:10.1186/s12884-019-2184-z), 2019-01-18
Supplement: 12884_2019_2184_MOESM1_ESM.pdf [file 12884_2019_2184_MOESM1_ESM.pdf]

**Table 1: Lists of variables used in measuring stages in Intrapartum and immediate postpartum quality in Northern Ethiopia study**

| <b>Variables used to measure stage of quality intrapartum care:</b>                                                                                                      | <b>Observed</b> |    |
|--------------------------------------------------------------------------------------------------------------------------------------------------------------------------|-----------------|----|
| <b>A. During Admission:</b>                                                                                                                                              |                 |    |
| Provider greets the woman and her companion (if present) in a cordial manner                                                                                             | Yes             | No |
| Provider responds to mother immediate needs (thirst, hunger, cold/hot, need to urinate,                                                                                  | Yes             | No |
| Provider ask mothers name                                                                                                                                                | Yes             | No |
| Provider ask her age                                                                                                                                                     | Yes             | No |
| Provider ask about number of previous pregnancies/births                                                                                                                 | Yes             | No |
| Provider ask any complications during labour and postpartum period                                                                                                       | Yes             | No |
| Provider ask other general medical problems                                                                                                                              | Yes             | No |
| Provider ask use of medications                                                                                                                                          | Yes             | No |
| Provider ask about her HIV status                                                                                                                                        | Yes             | No |
| Provider estimate gestational age using last menstrual period                                                                                                            | Yes             | No |
| Provider ask mothers how frequently labour are occurring                                                                                                                 | Yes             | No |
| Provider ask if her membranes ruptured: when, what color and what smell it had                                                                                           | Yes             | No |
| Provider ask mothers whether she feels the baby's movements                                                                                                              | Yes             | No |
| Provider ask mothers when the painful regular contractions began                                                                                                         | Yes             | No |
| Provider ask mothers whether she has experienced vaginal bleeding, fever, severe headaches, blurred vision, convulsion, or if any other problems the client is concerned | Yes             | No |
| Provider performs HIV test if status unknown                                                                                                                             | Yes             | No |
| Provider records the information on clinical history chart                                                                                                               | Yes             | No |
| Ensures privacy with screen or curtain to separate the women from others at least during examination                                                                     | Yes             | No |
| Washes hands with running water and soap for 10-15 seconds and dries with an individual clean towel or allows hands to air dry                                           | Yes             | No |
| Explain each step                                                                                                                                                        | Yes             | No |
| At least one encourage the woman to ask questions                                                                                                                        | Yes             | No |
| Respond to the woman/ companion questions politely and in respectful manner                                                                                              | Yes             | No |
| <b>B. First stage of labour:</b>                                                                                                                                         |                 |    |
| Providers takes mother temperature                                                                                                                                       | Yes             | No |
| Provider takes mother pulse                                                                                                                                              | Yes             | No |
| Provider measures mother blood pressure                                                                                                                                  | Yes             | No |
| Provider determines mother respiratory rate                                                                                                                              | Yes             | No |
| Provider measures mother fundal height                                                                                                                                   | Yes             | No |
| Provider determines foetal lie and presentation                                                                                                                          | Yes             | No |
| Provider identifies degree of decent by abdominal palpation (from five to zero fingers above the pubis)                                                                  | Yes             | No |
| Provider evaluates uterine contractions (frequency and duration over a 10- minute period)                                                                                | Yes             | No |
| Provider Auscultates foetal heart rate (FHR)                                                                                                                             | Yes             | No |
| <b>During physical examination, providers:</b>                                                                                                                           |                 |    |
| Puts sterile gloves on both hands                                                                                                                                        | Yes             | No |
| Carefully inserts two fingers of the exam hand                                                                                                                           | Yes             | No |
| Assess cervical examination                                                                                                                                              | Yes             | No |

|                                                                                                                                                                                  |     |    |
|----------------------------------------------------------------------------------------------------------------------------------------------------------------------------------|-----|----|
| Assesses molding                                                                                                                                                                 | Yes | No |
| Assesses station of presenting part                                                                                                                                              | Yes | No |
| Assesses position                                                                                                                                                                | Yes | No |
| Gloves are removed after being immersed in 0.5% chlorine solution and placed in a leak-proof container                                                                           | Yes | No |
| Records all information on the clinical records                                                                                                                                  | Yes | No |
| Provider start partograph to follow progress of labour                                                                                                                           | Yes | No |
| <b>Infection prevention practice of providers:</b>                                                                                                                               |     |    |
| Cleanse the vulva with antiseptic solution before performing vaginal examination                                                                                                 | Yes | No |
| Performs limited vaginal examination (e.g, every four hours or indicated)                                                                                                        | Yes | No |
| Uses sterile gloves when performing vaginal examination or when in contact with body fluids                                                                                      | Yes | No |
| Rupture of membranes is not performed routinely                                                                                                                                  | Yes | No |
| <b>Provider prepares to assist the birth:</b>                                                                                                                                    |     |    |
| Has the delivery pack and other essential material and ready to assist the delivery (delivery set, episiotomy set, newborn resuscitation set, glove, delivery gown, apron, mask) | Yes | No |
| Prior to delivery, washes hands with running water and soap for 10-15 seconds and dries an individual clean towel or allows hands to air dry                                     | Yes | No |
| Puts sterile double gloves on hands                                                                                                                                              | Yes | No |
| <b>Provider:</b>                                                                                                                                                                 |     |    |
| At least once encourage woman to walk around                                                                                                                                     | Yes | No |
| At least once encourage the woman to change position according to the desire and comfort                                                                                         | Yes | No |
| At least once encourage the woman to take light food or drink fluid in labour                                                                                                    | Yes | No |
| Allow the woman to have her preference companion at labour room                                                                                                                  | Yes | No |
| Provide emotional support to woman during labour and delivery                                                                                                                    | Yes | No |
| At least once encourages her to empty her bladder                                                                                                                                | Yes | No |
| <b>C. Second stage of labour: provider</b>                                                                                                                                       |     |    |
| Holds the baby by the trunk and places the baby on a clean dry towel on the mother's abdomen                                                                                     | Yes | No |
| Dries baby vigorously and changes wet towel for a clean dry one                                                                                                                  | Yes | No |
| Ties or clamps cord when pulsations stop, or by 2-3 minutes after birth (no immediately after birth)                                                                             | Yes | No |
| Cuts/clamps the umbilical cord using sterile scissors under gauze to prevent blood spurting                                                                                      | Yes | No |
| If the baby is breathing normally, passes the baby to mother for skin-to-skin contact on breast                                                                                  | Yes | No |
| Note the time of birth and records on partograph or in other records                                                                                                             | Yes | No |
| <b>D. Third stage of labour: provider,</b>                                                                                                                                       |     |    |
| Palpate the mother's abdomen to rule-out the presence of a second baby                                                                                                           | Yes | No |
| Tells the woman that she will receive an injection and administers 10 IU of oxytocin IM or 600 mcg misoprostol orally within 1 minute of delivery                                | Yes | No |
| Place the other hand on the women's symphysis pubis (over the sterile towel)                                                                                                     | Yes | No |
| Maintain firm traction on the cord and waits for the uterus to contract                                                                                                          | Yes | No |
| Upon contraction, applies firm and sustained downward traction on the cord with counter traction above the pubis to guard the uterus, until the placenta is expelled             | Yes | No |
| If this maneuver does not provide immediate results, stops applying traction, holding the cord and clamp until the next contraction                                              | Yes | No |
| Repeats control cord traction during contraction while simultaneously applying counter                                                                                           | Yes | No |

|                                                                                                                                            |     |    |
|--------------------------------------------------------------------------------------------------------------------------------------------|-----|----|
| traction above pubis to guard uterus                                                                                                       |     |    |
| With both hands, assists in the expulsion of the placenta by turning it over in the hands without applying traction twisting the membranes | Yes | No |
| Massage the uterus with one hand one sterile cloth over the abdomen until it contracts firmly                                              | Yes | No |
| Checks to see whether the placenta is complete (maternal and foetal sides, plus membranes, lobs)                                           | Yes | No |
| <b>E. Immediate postpartum periods: provider,</b>                                                                                          |     |    |
| Make sure that the woman is comfortable (clean, hydrated and warmly covered)                                                               | Yes | No |
| Ensures that the baby is well covered                                                                                                      | Yes | No |
| Administer vitamin K to newborn                                                                                                            | Yes | No |
| Provides tetracycline eye ointment 1% prophylaxis to newborn                                                                               | Yes | No |
| Observe breast feeding initiated within the first hour after birth                                                                         | Yes | No |
| Weight the baby                                                                                                                            | Yes | No |
| Discards the placenta in a leak-proof container with a plastic liner                                                                       | Yes | No |
| Disposes of medical waste (gauze, etc) in a plastic container with a plastic liner                                                         | Yes | No |
| Puts the soiled linen in a leak-proof container                                                                                            | Yes | No |
| Places all reusable instruments in a 0.5% chlorine solution for 10 minutes                                                                 | Yes | No |
| Disposes needle and siring in a puncture-resistance container, without removing, recapping or breaking the needle                          | Yes | No |
| Gloves are removed after being immersed in 0.5% chlorine solution and placed in a leak-proof container                                     | Yes | No |
| Washes hands with running water and soap for 10-15seconds and dries with an individual clean towel or allows hands to air dry              | Yes | No |
| <b>Provider monitors the mother and newborn after birth:</b>                                                                               |     |    |
| Baby's breathing condition and breastfeeding                                                                                               | Yes | No |
| Vaginal bleeding                                                                                                                           | Yes | No |
| Bladder distension                                                                                                                         | Yes | No |
| Blood pressure                                                                                                                             | Yes | No |
| Uterine contraction                                                                                                                        | Yes | No |
| Pulse                                                                                                                                      | Yes | No |
| Consciousness                                                                                                                              | Yes | No |
| Assists the woman with breastfeeding                                                                                                       | Yes | No |
| Asks the woman if she has urinated and encourages her to do so whenever she wishes                                                         | Yes | No |
| Records the information on the women's clinical record and reports any abnormalities                                                       | Yes | No |

**Table 2: Lists of variables used in measuring quality newborn care during immediate postpartum quality in Northern Ethiopia study**

| <b>Qno</b> | <b>Observe whether skilled birth attendant do the following after birth for the newborns</b> | <b>Response (observed)</b> | <b>Remark</b> |
|------------|----------------------------------------------------------------------------------------------|----------------------------|---------------|
|            | Skilled personnel:                                                                           |                            |               |
| 1          | Dries newborn baby vigorously and change wet towel immediately after birth                   | 1. Yes      2. No          |               |
| 2          | Evaluate breathing of newborn                                                                | 1. Yes      2. No          |               |
| 3          | Tie or clamp cord after 2-3 minute of birth                                                  | 1. Yes      2. No          |               |
| 4          | Ensure the baby is covered                                                                   | 1. Yes      2. No          |               |
| 5          | Ensure the baby is in skin to skin contact with mother                                       | 1. Yes      2. No          |               |
| 6          | keep newborn in the same room with mother                                                    | 1. Yes      2. No          |               |
| 7          | Ensure baby is start breastfeeding within 1 hour                                             | 1. Yes      2. No          |               |
| 8          | Administered TTC eye ointment                                                                | 1. Yes      2. No          |               |
| 9          | Administered vitamin K                                                                       | 1. Yes      2. No          |               |
| 10         | Weight the newborn baby                                                                      | 1. Yes      2. No          |               |
| 11         | Check newborn breathing and breast feeding status every 15 minutes                           | 1. Yes      2. No          |               |

**Table 3: Lists of variables used in measuring friendly mother and newborn care in Northern Ethiopia study**

| <b>Qno</b> | <b>Observe whether skilled birth attendant do the following after birth to mother and newborns</b> | <b>Response (observed)</b> | <b>Remark</b> |
|------------|----------------------------------------------------------------------------------------------------|----------------------------|---------------|
| 1          | Ensure privacy during labour                                                                       | 1. Yes      2. No          |               |
| 2          | No physical emotionally and verbally abused                                                        |                            |               |
| 3          | Evidence based practice (eg. Limited vaginal examination and no rupture of member routinely)       | 1. Yes      2. No          |               |
| 4          | Adopt preferred position to mother during labour                                                   |                            |               |
| 5          | Allow fluid or light food during labour                                                            | 1. Yes      2. No          |               |
| 6          | Allow preferred birthing partner                                                                   | 1. Yes      2. No          |               |
| 7          | Skin to skin mother baby care                                                                      | 1. Yes      2. No          |               |
| 8          | Early breast feeding with in 1 hr                                                                  | 1. Yes      2. No          |               |
| 9          | Affordable or free maternity care                                                                  | 1. Yes      2. No          |               |
