# Supplementary material for: Quality of intrapartum and newborn care in Tigray, Northern Ethiopia
Source: PubMed Central journal article supplement (PMC6339373; doi:10.1186/s12884-019-2184-z), 2019-01-18
Supplement: 12884_2019_2184_MOESM2_ESM.pdf [file 12884_2019_2184_MOESM2_ESM.pdf]

Table 1: List of variable used to measure skilled birth attendants knowledge on basic and emergency obstetric care

| Knowledge question on basic and emergency obstetric care |                                                                                                |                                                                                                                                                                                                                                                                                                                                                               |        |                                                                                                                                                            |
|----------------------------------------------------------|------------------------------------------------------------------------------------------------|---------------------------------------------------------------------------------------------------------------------------------------------------------------------------------------------------------------------------------------------------------------------------------------------------------------------------------------------------------------|--------|------------------------------------------------------------------------------------------------------------------------------------------------------------|
| Essential obstetric care                                 | Response                                                                                       | Code                                                                                                                                                                                                                                                                                                                                                          | Answer |                                                                                                                                                            |
| 1                                                        | How did you establish the patient was in labor?                                                | 1. Regular uterine contraction<br>2. Cervical dilatation<br>3. Show (bloody mucous discharge)<br>4. Breakage of water/ruptured membranes<br>5. Other (specify):                                                                                                                                                                                               | 0<br>1 | <b>Essential signs</b><br>If variables 1, 2 are both mentioned enter 1 in box below.<br>Enter 0 if less than the essential two are entered                 |
| 2                                                        | What observations or monitoring do you normally carry out during labour?                       | 1. Monitor fetal heart rate pattern<br>2. Assess degree of molding<br>3. Assess cervical dilatation<br>4. Assess descent of head<br>5. Monitor uterine contractions<br>6. Monitor maternal blood pressure<br>7. Monitor maternal respiratory rate<br>8. Monitor maternal temperature<br>9. Monitor maternal pulse<br>10. Check the urine 11. Other (specify): | 0<br>1 | <b>Essential actions</b><br>If variables 1, 2, 3, 4, 5 and 6 are all mentioned enter 1 in box below.<br>Enter 0 if less than the essential six are entered |
| 3                                                        | Where do you normally record these observations?                                               | 1. On a partograph<br>2. In patients' notes<br>3. On partograph and patients' notes<br>4. On antenatal card<br>5. On a piece of paper 6. Other (specify):                                                                                                                                                                                                     | 0<br>1 | <b>Essential action</b><br>If variable 1 is mentioned enter 1 in box below.<br>Enter 0 if variable one not mentioned                                       |
| 4                                                        | Last time you attended to a delivery, what was the immediate care you gave to the newborn?     | 1. After birth of head, wipe face, nose, mouth<br>2. Cord care (sterile cut 4-6cm / umbilicus)<br>3. Ensure baby is breathing<br>4. Thermal protection<br>5. Breastfeeding initiated within one hour<br>6. Assess/examine newborn within one hour<br>7. Baby weighed<br>8. Eye prophylaxis                                                                    | 0<br>1 | <b>Essential actions</b><br>If variables 1, 2, 3 and 4 are all mentioned enter 1 in box below.<br>Enter 0 if less than the essential six are entered       |
| 5                                                        | When a woman comes with or develops heavy bleeding after delivery, what signs do you look for? | 1. Uncontracted uterus<br>2. Signs of shock (dizziness, low BP)<br>3. Amount of external bleeding<br>4. Retained products/placenta<br>5. Check if bladder is full<br>6. Genital tract injuries<br>7. Signs of anemia<br>8. Other (specify):                                                                                                                   | 0<br>1 | <b>Essential actions</b><br>If variables 1, 2, 3, 4 and 5 are all mentioned enter 1 in box below.<br>Enter 0 if less than the essential six are entered    |
| 6                                                        | When a woman comes with or develops heavy bleeding after delivery, what action do you take?    | 1. Massage the fundus<br>2. Empty the woman's bladder<br>3. Give ergometrine im or iv (Oxytocin)<br>4. Start IV fluids<br>5. Take blood for Hb, and X-matching<br>6. Examine the woman for lacerations<br>7. Manual removal of retained products<br>8. Refer<br>9. Raise foot of bed<br>10. Other (specify):                                                  | 0<br>1 | <b>Essential actions</b><br>If variables 1, 2, 3 and 4 are all mentioned enter 1 in box below.<br>Enter 0 if less than the essential six are entered       |
| 7                                                        | When a woman you have just delivered has a retained                                            | 1. Empty urinary bladder<br>2. Apply controlled cord traction                                                                                                                                                                                                                                                                                                 | 0<br>1 | <b>Essential actions</b><br>If variables 1, 2, 3 and 4 are                                                                                                 |

|    |                                                                                               |                                                                                                                                                                                                                                                                                                                                                                                     |        |                                                                                                                                                                                            |
|----|-----------------------------------------------------------------------------------------------|-------------------------------------------------------------------------------------------------------------------------------------------------------------------------------------------------------------------------------------------------------------------------------------------------------------------------------------------------------------------------------------|--------|--------------------------------------------------------------------------------------------------------------------------------------------------------------------------------------------|
|    | placenta, what actions do you take?                                                           | <ol style="list-style-type: none"> <li>3. Repeat oxytocics</li> <li>4. Apply manual removal of the placenta</li> <li>5. Give IV fluids</li> <li>6. Monitor vital signs for shock &amp; act</li> <li>7. Check uterus is well contracted</li> <li>8. Test blood for group and cross match</li> <li>9. Prepare for theater</li> <li>10. Refer</li> <li>11. Other (specify):</li> </ol> |        | all mentioned enter <b>1</b> in box below.<br>Enter <b>0</b> if <b>less</b> than the essential six are entered                                                                             |
| 8  | When a woman comes with general malaise 48 hours after delivery, what signs do you look for?  | <ol style="list-style-type: none"> <li>1. High pulse</li> <li>2. High fever</li> <li>3. Septic shock (unrecordable BP)</li> <li>4. Sub-involuted tender uterus</li> <li>5. Foul smelling lochia</li> <li>6. Tender abdomen</li> </ol>                                                                                                                                               | 0<br>1 | <b>Essential actions</b><br>If variables <b>1, 2, 3, 4</b> and <b>5</b> are all mentioned enter <b>1</b> in box below.<br>Enter <b>0</b> if <b>less</b> than the essential six are entered |
| 9  | When a woman complains of malaise 48 hours after delivery, what do you do?                    | <ol style="list-style-type: none"> <li>1. Start IV fluids</li> <li>2. Give parenteral antibiotics before referral to doctor or hospital</li> <li>3. Administer analgesics/antipyretic</li> <li>4. Take blood for BS &amp; give malaria prophylaxis in endemic areas</li> <li>5. Palpate abdomen</li> <li>6. Examine lochia, perineum and breasts</li> <li>7. Refer</li> </ol>       | 0<br>1 | <b>Essential actions</b><br>If variables <b>1, 2, 3</b> and <b>4</b> are all mentioned enter <b>1</b> in box below.<br>Enter <b>0</b> if <b>less</b> than the essential six are entered    |
| 10 | What danger signs would you look for if a pregnant woman comes with suspected severe malaria? | <ol style="list-style-type: none"> <li>1. High temperature (above 38C)</li> <li>2. Confusion/Coma</li> <li>3. Pallor</li> <li>3. Jaundice (yellow eyes)</li> <li>4. Status of the fetus</li> <li>5. Dizziness</li> <li>6. Joint pains</li> <li>7. Dehydration</li> </ol>                                                                                                            | 0<br>1 | <b>Essential actions</b><br>If variables <b>1, 2, 3</b> and <b>4</b> are all mentioned enter <b>1</b> in box below.<br>Enter <b>0</b> if <b>less</b> than the essential six are entered    |
| 11 | What are the signs for asphyxia neonatorum?                                                   | <ol style="list-style-type: none"> <li>1. Heart rate less 100BPM</li> <li>2. Gasping respiration</li> <li>3. Slight muscle flexion</li> <li>4. Poor or no reflexes</li> <li>5. Blue to pale color</li> </ol>                                                                                                                                                                        | 0<br>1 | <b>Essential actions</b><br>If variables <b>1, 2, 3, 4</b> and <b>5</b> are all mentioned enter <b>1</b> in box below.<br>Enter <b>0</b> if <b>less</b> than the essential six are entered |
| 12 | What are the signs and symptoms of infection in the newborn (sepsis)?                         | <ol style="list-style-type: none"> <li>1. Poor or no breastfeeding</li> <li>2. Hypothermia or hyperthermia</li> <li>3. Restlessness or irritability</li> <li>4. Respiratory difficulty</li> <li>5. Foci of infection may be found in throat, skin, eyes</li> <li>6. No apparent source of infection</li> </ol>                                                                      | 0<br>1 | <b>Essential actions</b><br>If variables <b>1, 2, 3</b> and <b>4</b> are all mentioned enter <b>1</b> in box below.<br>Enter <b>0</b> if <b>less</b> than the essential six are entered    |
| 13 | When a newborn is presented with signs of infection what action do you take?                  | <ol style="list-style-type: none"> <li>1. Continue breastfeeding topped with</li> <li>2. EBM via NG tube if necessary</li> <li>3. Keep the baby warm</li> <li>4. Keep airway clear</li> <li>5. Start antibiotics and refer</li> <li>6. Explain situation/condition to the mother or caregiver</li> </ol>                                                                            | 0<br>1 | <b>Essential actions</b><br>If variables <b>1, 2, 3</b> and <b>4</b> are all mentioned enter <b>1</b> in box below.<br>Enter <b>0</b> if <b>less</b> than the essential six are entered    |
| 14 | When a newborn is less than 2.5 kgs, what extra care do you provide?                          | <ol style="list-style-type: none"> <li>1. Ensure thermal protection (skin-to-skin, etc.)</li> <li>2. Provide extra support to mother to establish and maintain breastfeeding</li> <li>3. Monitor baby closely for first 24 hours</li> </ol>                                                                                                                                         | 0<br>1 | <b>Essential actions</b><br>If variables <b>1, 2, 3</b> and <b>4</b> are all mentioned enter <b>1</b> in box below.                                                                        |

|    |                                                                                    |                                                                                                                                                                                                                                                                                                                                                             |                   |                                                                                                                                                                                  |
|----|------------------------------------------------------------------------------------|-------------------------------------------------------------------------------------------------------------------------------------------------------------------------------------------------------------------------------------------------------------------------------------------------------------------------------------------------------------|-------------------|----------------------------------------------------------------------------------------------------------------------------------------------------------------------------------|
|    |                                                                                    | <ul style="list-style-type: none"> <li>4. Ensure infection prevention</li> <li>5. Monitor sucking capability</li> <li>6. Refer to hospital</li> </ul>                                                                                                                                                                                                       |                   | Enter <b>0</b> if <b>less</b> than the essential six are entered                                                                                                                 |
| 15 | What procedures are no longer carried out routinely during labor and delivery?     | <ul style="list-style-type: none"> <li>1. Artificial rupture of membranes</li> <li>2. Episiotomies</li> <li>3. Shaving</li> <li>4. Routine suction of newborn babies</li> <li>5. Bathing the baby within 24 hours</li> <li>6. Milking of cord</li> <li>7. Enema</li> </ul>                                                                                  | <p>0</p> <p>1</p> | <p><b>Essential Actions</b></p> <p>Enter 1 in box if 3 or more are mentioned.</p> <p>Enter <b>0</b> if <b>less</b> than 3 are mentioned.</p>                                     |
| 16 | What actions should you take if a mother come with obstructed labour               | <ul style="list-style-type: none"> <li>1. Start IV fluid</li> <li>2. Give parenteral antibiotics</li> <li>3. Call doctor or refer</li> <li>4. Monitor vital signs</li> <li>5. Prepare for cesarean section</li> <li>6. Take blood for Hb, group, and X match</li> <li>7. Drain bladder by catheter</li> <li>8. Record observations on partograph</li> </ul> | <p>0</p> <p>1</p> | <p><b>Essential Actions</b></p> <p>If variables <b>1, 2</b> and <b>3</b> are all mentioned enter 1 in box below.</p> <p>Enter 0 if less than the essential three are entered</p> |
| 17 | What actions should you take if a mother come with sever preeclampsia or eclampsia | <ul style="list-style-type: none"> <li>1. Place in side-lying position</li> <li>2. Protect from injury and spatula insidemoth</li> <li>3. Give magnesium sulfate</li> <li>4. Provide antihypertensives</li> <li>5. Administer oxygen at 4–6 L per minute</li> <li>6. Refer</li> </ul>                                                                       | <p>0</p> <p>1</p> | <p><b>Essential Actions</b></p> <p>If variables <b>1, 2</b> and <b>3</b> are all mentioned enter 1 in box below.</p> <p>Enter 0 if less than the essential three are entered</p> |

Table 2: List of questions used to measure completeness of partograph during the progress of labour.

| <b>s.no</b>     | <b>The provider uses the partograph to monitor labour: observe, whether the provider completes partograph consistently</b> | <b>Resposne</b> |       | <b>Remark</b> |
|-----------------|----------------------------------------------------------------------------------------------------------------------------|-----------------|-------|---------------|
| <b><i>A</i></b> | <b><i>Records partograph information consistently</i></b>                                                                  |                 |       |               |
| 1               | Records fetal heart rate every half hour                                                                                   | 1. Yes          | 2. No |               |
| 2               | Records maternal pulse rate every half hour                                                                                | 1. Yes          | 2. No |               |
| 3               | Records strength and frequency of uterine contraction every 30min                                                          | 1. Yes          | 2. No |               |
| 4               | Records Blood pressure every four hours                                                                                    | 1. Yes          | 2. No |               |
| 5               | Records temperature every four hours                                                                                       | 1. Yes          | 2. No |               |
| 6               | Records vaginal examination every four hours                                                                               | 1. Yes          | 2. No |               |
| 7               | Records fetal descent/station every four hours                                                                             | 1. Yes          | 2. No |               |
| 8               | Records cervical dilatation and position every four hours                                                                  | 1. Yes          | 2. No |               |
| 9               | At every vaginal examination checks amniotic fluids and status of membrane                                                 | 1. Yes          | 2. No |               |
| 10              | At every vaginal examination checks the degree of molding                                                                  | 1. Yes          | 2. No |               |
| <b><i>B</i></b> | <b><i>Records partograph information completely</i></b>                                                                    |                 |       |               |
| 11              | Records client name, gravid and parity                                                                                     | 1. Yes          | 2. No |               |
| 12              | Date and time of admission                                                                                                 | 1. Yes          | 2. No |               |
| 13              | Records time of rupture of membrane                                                                                        | 1. Yes          | 2. No |               |
| 14              | Records all drugs, IV fluids she is taking                                                                                 | 1. Yes          | 2. No |               |
